# Supplementary material for: Processes, spatial patterns, and impacts of the 1743 extreme-heat event in northern China: from the perspective of historical documents
Source: Copernicus journal article supplement (doi:10.5194/cp-20-2455-2024), 2024-11-08
Supplement: Supplementary file 1 [file cp-20-2455-2024-supplement.zip]

## Sheet: Yu-Fen-Cun
Lunar Date	Month	Date	Number of county with precipitation	Dingxing	Shenze	Quyang	Zaoqiang	Wuyi	Nangong	Hengshui	Xinhe	Wuqiang	Raoyang	Laishui	Guangchang	Baixiang	Gaoyi	Longping	Yutian	Fengrun	Tangxian	Shulu	Lixian	Qizhou	Gaoyang	Mancheng	Qingyuan	Xiongxian	Boye	Ansu	Xincheng	Rongcheng	Wangdu	Lulong	Anzhou	Xinan	Nanle	Yuancheng	Daming	Kaizhou	Dongming	Qingfeng	Changyuan	Suning	Wuqiao	Fucheng	Xianxian	Jingzhou	Gucheng
1		24	0
2		25	2													1.5
3		26	2
4		27	0
5		28	0
6		29	0
7		30	0
8	5	1	0
9		2	0
10		3	0
11		4	0
12		5	0
13		6	0
14		7	0
15		8	0
16		9	0
17		10	5																																		1.5			1.5	1.5	1.5	1.5
18		11	0
19		12	0
20		13	0
21		14	0
22		15	0
23		16	0
24		17	1
25		18	0
26		19	0
27		20	0
28		21	0
29		22	0
30		23	0
1		24	0
2		25	0
3		26	0
4		27	0
5		28	0
6		29	0
7		30	0
8		31	14																3	6																			8			6
9	6	1	51		4			2	3	3	2	3	4			4	5	2					3	4	3				3											8						2	4
10		2	0
11		3	3
12		4	14																4	3														8							5
13		5	1																															5
14		6	0
15		7	0
16		8	0
17		9	16											3					1	1			2		2								2
18		10	0
19		11	2																																					4	2
20		12	0
21		13	5																												2
22		14	2
23		15	0
24		16	7												6
25		17	39	2	3	3		3		2				5							3		8	5	5		4		5		2	3			3		4		2		5					3
26		18	23	5													4				5				2	3	5		4				3
27		19	24		6	3				4		2	4			2						5	9		7										4	5										2	2
28		20	8																																										3			2
29		21	0
1		22	0
2		23	2
3		24	2								3
4		25	0
5		26	1																															2
6		27	9													3	3	3
7		28	9																																										3			2
8		29	0
9		30	0
10	7	1	0
11		2	1
12		3	1
13		4	5																																					6
14		5	25				2	2	2	2	2								2	3
15		6	15																															5
16		7	9																	4														4
17		8	5												3				5	5
18		9	3																																						4		3
19		10	15									3				3				4
20		11	5																4
21		12	27		2	2							2	2	3			3			3			2		1	5	1.5		1		1	3		4	3				6	3		4	1
22		13	2																																			3	3
23		14	9																																		4	4	4		5	4	4
24		15	5																							1	3
25		16	3
26		17	1
27		18	1
28		19	3
29		20	9												4									2					1
1		21	0
2		22	0
3		23	0
4		24	0
5		25	6	4																					1														3
6		26	59	13		2								5	8	3		5	2	1.5	3		3	1		1.5		2		4	1	2	2				3	3			6	2	5
7		27	27						2	2															4		1.5								1.5		5		4	8	4	5	6				1
8		28	2
9		29	69	2			3			1.5		2	1	5		4	3					2	4		5			5	3	2	1	2			3	2	4		12	10	6	6		1		1	2		1.5
10		30	31			5			3		3							4			2										3			3					8
11		31	46	3	4					2					5							3		7		6	8		3	4	4	5	4		5									1					3
12	8	1	8				2.5												3															8
13		2	27			3									13	7					5			5	2	2	5		3	3	5	2	3											1
14		3	4									3																				2
15		4	1																																													2
16		5	2																																					3		2
17		6	9
18		7	5																																					8		12	2		3
19		8	2
20		9	1
21		10	7				3																																										3
22		11	10																															8
23		12	41					2		2						2.5			3	3											2						4		8	10	4	10			5				2.5
24		13	0
25		14	3
26		15	8	2										5	10																2
27		16	4
28		17	0
29		18	2
1		19	15	2		5															5					2							1
2		20	10																	3							3							5
3		21	39	3			6	6				3			10		5	6	8							2	2												4							5
4		22	55		4				2				4			3				4		4	4	4	5		4		4	4	3	4		8	3	2	5			3		10		3	4		5	3	3
5		23	3
6		24	87	5	5	4	5	6	4	5	3	4	5			5	5		8			4	6	5	8	3.5	5	4	3	4	4			5	5	5			10	6		4		5	5	7	6	6	5
7		25	1
8		26	0
9		27	0
10		28	0
11		29	0
12		30	0
13		31	0
[truncated: 86 more columns]

## Sheet: Instruction
The table gives the Yu-Fen-Cun in different counties on different dates. (Yu-Fen-Cun: Roughly equivalent to a wetting front after each precipitation event.）
For each county i, if the county receives precipitation on day j, i.e., the Yu-Fen-Cun > 0,it is recorded as i1, otherwise it is recorded as i0. Then the number of counties with precipitation on day j is: Rj = count(i1). If Rj>=10, it is considered that large-scale precipitation occurred on that day.
