# Supplementary material for: Processes, spatial patterns, and impacts of the 1743 extreme-heat event in northern China: from the perspective of historical documents
Source: Copernicus journal article supplement (doi:10.5194/cp-20-2455-2024), 2024-11-08
Supplement: Supplementary file 2 [file cp-20-2455-2024-supplement.zip]

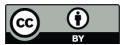

## *Supplement of*

# **Processes, spatial patterns, and impacts of the 1743 extreme-heat event in northern China: from the perspective of historical documents**

**Le Tao et al.**

*Correspondence to:* Yun Su ([suyun@bnu.edu.cn](mailto:suyun@bnu.edu.cn))

- [cp-20-2455-2024-supplement-title-page.pdf](#)
- [Table S1-Original historical records about 1743 extreme heat.xlsx](#)
- [Table S2-Yu-Xue-Fen-Cun records and the process.xlsx](#)
- [Table S3- Records with time hints.pdf](#)

The copyright of individual parts of the supplement might differ from the article licence.
